# Supplementary material for: miR-31-5p Is a Potential Circulating Biomarker and Therapeutic Target for Oral Cancer
Source: PubMed Central journal article supplement — Mol Ther Nucleic Acids. 2019 Apr 11;16:471–80. doi: 10.1016/j.omtn.2019.03.012 (PMC6495075; doi:10.1016/j.omtn.2019.03.012), 2019-04-11
Supplement: mmc1.pdf [file mmc1.pdf]

OMTN, Volume 16

## **Supplemental Information**

### **miR-31-5p Is a Potential Circulating Biomarker and Therapeutic Target for Oral Cancer**

**Zhiyuan Lu, Qianting He, Jianfeng Liang, Wuguo Li, Qiao Su, Zujian Chen, Quan Wan, Xiaofeng Zhou, Laurel Cao, Jingjing Sun, Yu Wu, Lin Liu, Xinming Wu, Jinsong Hou, Keqian Lian, and Anxun Wang**

**Supplementary Table S1 The serum miRNA levels in oral cancer patients detected by qRT-PCR**

| Factors             | miR-99a-5p<br>( $\Delta$ Ct) | <i>p</i> | miR-31-5p<br>( $\Delta$ Ct) | <i>p</i> | miR-138-5p<br>( $\Delta$ Ct) | <i>p</i> | miR-21-5p<br>( $\Delta$ Ct) | <i>p</i> | miR-375-3p<br>( $\Delta$ Ct) | <i>p</i> |
|---------------------|------------------------------|----------|-----------------------------|----------|------------------------------|----------|-----------------------------|----------|------------------------------|----------|
| Age $\geq$ 60       | 2.61 $\pm$ 1.75              | 0.919    | -3.41 $\pm$ 1.87            | 0.394    | 2.21 $\pm$ 1.56              | 0.332    | -3.34 $\pm$ 1.46            | 0.919    | 2.30 $\pm$ 1.48              | 0.516    |
| Age<60              | 2.47 $\pm$ 1.28              |          | -3.63 $\pm$ 1.95            |          | 2.35 $\pm$ 1.23              |          | -3.40 $\pm$ 1.81            |          | 2.39 $\pm$ 1.22              |          |
| Male                | 2.72 $\pm$ 1.51              | 0.068    | -3.48 $\pm$ 2.00            | 0.754    | 2.40 $\pm$ 1.51              | 0.193    | -3.25 $\pm$ 1.65            | 0.290    | 2.25 $\pm$ 1.40              | 0.075    |
| Female              | 2.02 $\pm$ 1.47              |          | -3.63 $\pm$ 1.61            |          | 1.94 $\pm$ 0.95              |          | -3.70 $\pm$ 1.58            |          | 1.90 $\pm$ 1.10              |          |
| T <sub>1+2</sub>    | 2.45 $\pm$ 1.54              | 0.141    | -3.28 $\pm$ 2.42            | 0.274    | 2.19 $\pm$ 1.39              | 0.200    | -2.95 $\pm$ 1.44            | 0.151    | 2.23 $\pm$ 1.34              | 0.070    |
| T <sub>3+4</sub>    | 2.82 $\pm$ 1.47              |          | -3.59 $\pm$ 1.73            |          | 2.59 $\pm$ 1.41              |          | -3.49 $\pm$ 1.68            |          | 2.72 $\pm$ 1.34              |          |
| C <sub>I+II</sub>   | 2.26 $\pm$ 1.48              | 0.012    | -3.12 $\pm$ 2.20            | 0.100    | 1.92 $\pm$ 1.25              | 0.001    | -3.19 $\pm$ 1.58            | 0.545    | 2.01 $\pm$ 1.23              | 0.001    |
| C <sub>III+IV</sub> | 2.95 $\pm$ 1.52              |          | -3.79 $\pm$ 1.63            |          | 2.81 $\pm$ 1.45              |          | -3.49 $\pm$ 1.68            |          | 2.84 $\pm$ 1.39              |          |
| LN <sup>-</sup>     | 2.43 $\pm$ 1.48              | 0.135    | -2.85 $\pm$ 1.78            | 0.156    | 2.14 $\pm$ 1.35              | 0.068    | -3.34 $\pm$ 1.63            | 0.475    | 2.20 $\pm$ 1.32              | 0.059    |
| LN <sup>+</sup>     | 2.89 $\pm$ 1.65              |          | -3.72 $\pm$ 1.90            |          | 2.73 $\pm$ 1.51              |          | -3.45 $\pm$ 1.68            |          | 2.28 $\pm$ 1.38              |          |
| Well                | 2.86 $\pm$ 1.70              | 0.144    | -3.38 $\pm$ 2.09            | 0.530    | 2.54 $\pm$ 1.77              | 0.590    | -2.99 $\pm$ 1.89            | 0.028    | 2.52 $\pm$ 1.68              | 0.431    |
| Moderate-Poor       | 2.30 $\pm$ 1.35              |          | -3.63 $\pm$ 1.76            |          | 2.09 $\pm$ 1.02              |          | -3.65 $\pm$ 1.37            |          | 2.22 $\pm$ 1.03              |          |

**Supplementary Table S2 ROC curve analyses of serum miRNAs for distinguishing pre- from postoperation oral cancer patients in cohort 4.**

|              | AUC   | Sensitivity | Specificity | <i>p</i> value | 95% CI      |
|--------------|-------|-------------|-------------|----------------|-------------|
| miR-99a-5p   | 0.506 | 18.3%       | 91.5%       | 0.908          | 0.403-0.610 |
| miR-31-5p    | 0.666 | 74.5%       | 52.4%       | 0.002          | 0.571-0.761 |
| miR-138-5p   | 0.547 | 93.9%       | 21.3%       | 0.373          | 0.440-0.654 |
| miR-21-5p    | 0.611 | 59.6%       | 58.5%       | 0.037          | 0.507-0.714 |
| miR-375-3p   | 0.505 | 59.6%       | 45.1%       | 0.926          | 0.401-0.609 |
| Combination* | 0.780 | 81.7%       | 63.8%       | 0.000          | 0.693-0.868 |

\*Combination of miR-99a-5p, miR-31-5p, miR-138-5p, miR-21-5p and miR-375-3p.

**Supplementary Table S3 Clinical characterization of the cohorts used in this study\***

| Factors             | Cohort 1   |            | Cohort 2  | Cohort 3   | Cohort 4    |              |
|---------------------|------------|------------|-----------|------------|-------------|--------------|
|                     | OC (82)    | NC (53)    |           |            | Pre-op (82) | Post-op (47) |
| Age                 |            |            |           |            |             |              |
| ≥60                 | 41(50%)    | 12 (22.6%) | 5 (45.5%) | 13 (54.2%) | 41(50%)     | 19 (22.6%)   |
| <60                 | 41 (50%)   | 41 (77.4%) | 6 (54.5%) | 11 (45.8%) | 41 (50%)    | 28 (77.4%)   |
| Gender              |            |            |           |            |             |              |
| Male                | 61 (74.4%) | 27 (50.9%) | 9 (81.8%) | 19 (79.2%) | 61 (74.4%)  | 32 (50.9%)   |
| Female              | 21 (25.6%) | 26 (50.1%) | 2 (18.2%) | 5 (20.8%)  | 21 (25.6%)  | 15 (50.1%)   |
| T classification    |            |            |           |            |             |              |
| T <sub>1+2</sub>    | 63 (76.8%) |            | 8 (72.7%) | 17 (70.8%) | 63 (76.8%)  | 36 (76.6%)   |
| T <sub>3+4</sub>    | 19 (23.2%) |            | 3 (27.3%) | 7 (29.2%)  | 19 (23.2%)  | 11 (23.4%)   |
| Clinical stage      |            |            |           |            |             |              |
| C <sub>I+II</sub>   | 49 (59.8%) |            | 5 (45.5%) | 10 (41.7%) | 49 (59.8%)  | 27 (57.4%)   |
| C <sub>III+IV</sub> | 33 (40.2%) |            | 6 (54.5%) | 14 (58.3%) | 33 (40.2%)  | 20 (42.6%)   |
| LN metastases       |            |            |           |            |             |              |
| Negative            | 63 (76.8%) |            | 7 (63.6%) | 16 (66.7%) | 63 (76.8%)  | 34 (72.3%)   |
| Positive            | 19 (23.2%) |            | 4 (36.4%) | 8 (33.3%)  | 19 (23.2%)  | 13 (27.7%)   |
| Differentiation     |            |            |           |            |             |              |
| Well                | 35 (42.7%) |            | 5 (45.5%) | 11 (45.8%) | 35 (42.7%)  | 18 (38.3%)   |
| Moderate-Poor       | 47 (57.3%) |            | 6 (54.5%) | 13 (54.2%) | 47 (57.3%)  | 29 (61.7%)   |

\* OC: oral cancer patients, the pathologic diagnosis of all patients was squamous cell carcinoma; NC: normal subjects; Oral cancer cases of cohorts 2, 3 and 4 came from cohort 1; Cohort 2: 11 paired match tumor tissues and adjacent normal tissues; Cohort 3: 24 paired match tumor tissues and preoperation sera.

**Supplementary Table S4 The primer sequences of miRNAs used for qRT-PCR.**

|                | Primer sequences        |
|----------------|-------------------------|
| hsa-miR-99a-5p | AACCCGTAGATCCGATCTTGTG  |
| hsa-miR-31-5p  | AGGCAAGAGGCTGGCATAGC    |
| hsa-miR-138-5p | TGCTGGTGTTGTGAATCAGGC   |
| hsa-miR-21-5p  | GCAGCATACCAGACTGATGTTGA |
| hsa-miR-375-3p | ACTTTGTTCGTTTCGGCTCGC   |
| hsa-U6         | CTCGCTTCGGCAGCACA       |

**Supplementary Table S5 The sequences of the miR-31-5p mimic and antagomiR-31-5p**

---

| Sequences       |                              |
|-----------------|------------------------------|
| miR-31-5p mimic | 5'-AGGCAAGAUGCUGGCAUAGCU-3'  |
| antagomiR-31-5p | 5'-CAGCUAUGCCAGCAUCUUGCCU-3' |

---

**Supplementary Table S6 Clinicopathological characterization of two oral cancer patients for PDX models**

|                     | Case 1                                                           | Case 2                                                          |
|---------------------|------------------------------------------------------------------|-----------------------------------------------------------------|
| Age (years)         | 41                                                               | 42                                                              |
| Gender              | Male                                                             | Male                                                            |
| T classification    | T <sub>4</sub>                                                   | T <sub>2</sub>                                                  |
| Clinical stage      | C <sub>IV</sub> (T4N0M0)                                         | C <sub>IV</sub> (T2N2M0)                                        |
| LN metastases       | Negative                                                         | Positive                                                        |
| Differentiation     | Moderate                                                         | Moderate                                                        |
| Molecular pathology | Ki-67(40%+); E-cad(+);<br>Vim(+); c-Myc(+);<br>P53(80%+); HPV(-) | Ki-67(15%+); E-cad(+);<br>Vim(-); c-Myc(+);<br>P53(1%+); HPV(-) |

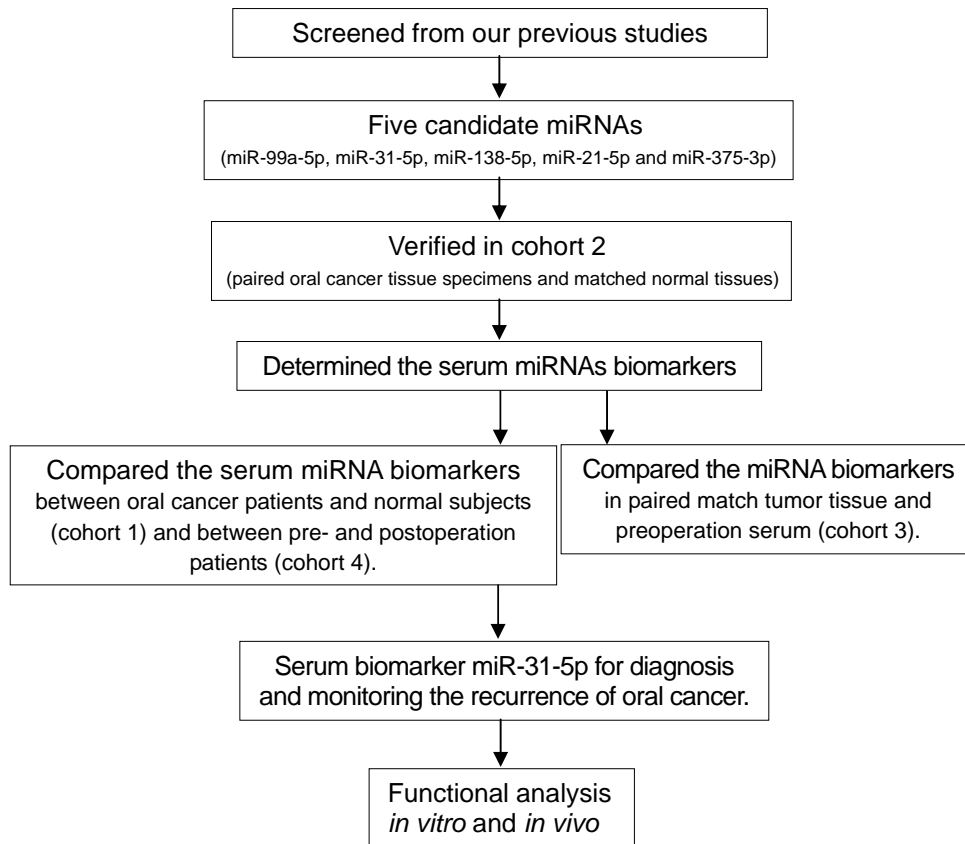

**Supplementary Figure S1 Flow-chart of the overall study design.**



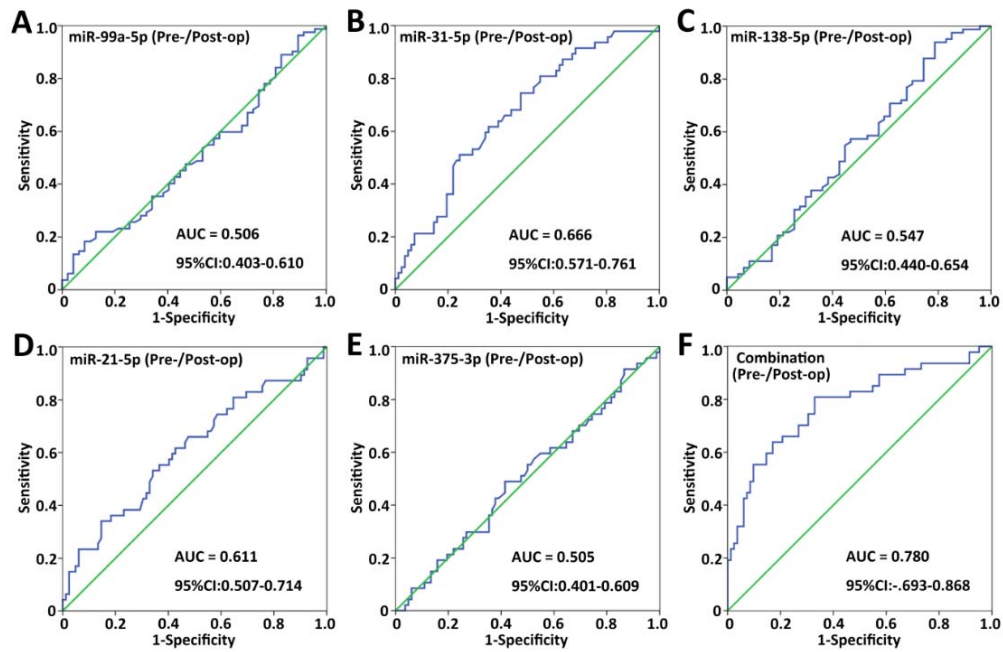

**Supplementary Figure S2 Predictive value of five serum miRNAs in pre- and postoperative oral cancer patients.**

ROC curves of serum miR-99a-5p (A), miR-31-5p (B), miR-138-5p (C), miR-21-5p (D) and miR-375-3p (E) levels and the five-miRNA panel (F) were used to differentiate pre- from postoperation oral cancer patients (n=47) in cohort 4.

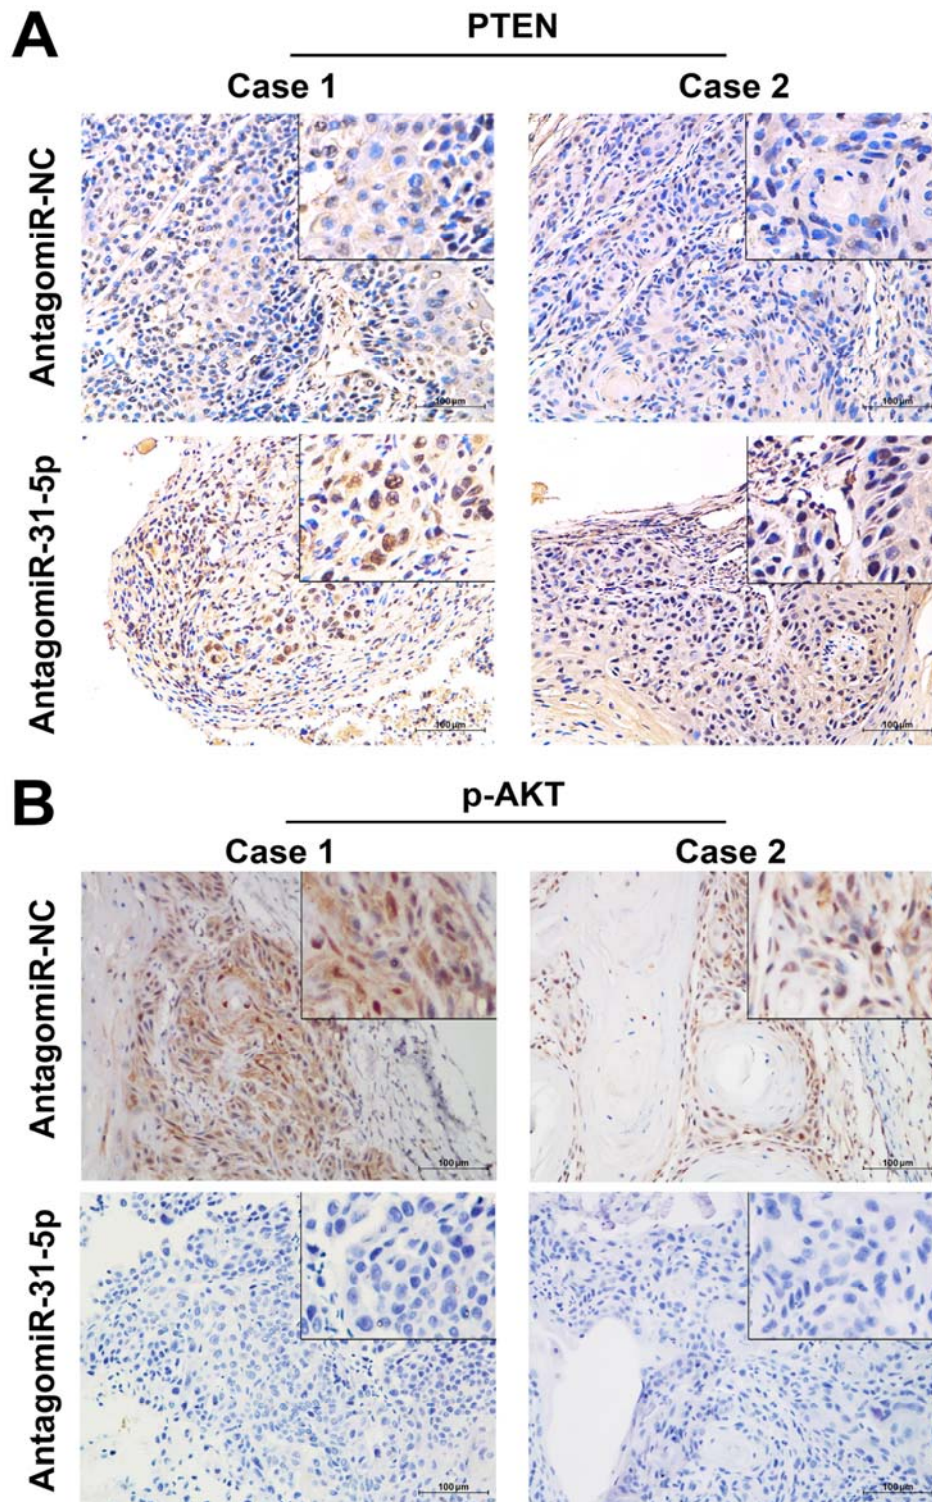

**Supplementary Figure S3 AntagomiR-31 inhibited the growth of PDX through the PTEN/AKT pathway**

(A-B) Representative immunohistochemical staining of PTEN (A) and p-AKT (B) expression in xenograft tissues (magnification,  $\times 200$ ).
